# Supplementary material for: Tricarbonylrhenium complexes from 2-pyridyl-1,2,3-triazole ligands bearing a 4-substituted phenyl arm: a combined experimental and theoretical study
Source: Royal Society of Chemistry journal article supplement (doi:10.1039/c3dt33071k), 2013-01-01
Supplement: c3dt33071k.pdf [file c3dt33071k.pdf]

## *Electronic Supplementary Information*

### **Tricarbonylrhenium complexes from 2-pyridyl-1,2,3-triazole ligands bearing a 4-substituted phenyl arm: a combined experimental and theoretical study**

Mariusz Wolff,<sup>1</sup> Luc Munoz,<sup>2,3</sup> Alison François,<sup>2,3</sup> Chantal Carrayon,<sup>2,3</sup> Achour Seridi,<sup>2,3</sup> Nathalie Saffon,<sup>4</sup> Claude Picard,<sup>2,3</sup> Barbara Machura,<sup>1</sup> and Eric Benoist<sup>1,2</sup>

<sup>1</sup>Department of Crystallography, Institute of Chemistry, University of Silesia, 9th Szkolna St., 40-006 Katowice, Poland,

<sup>2</sup> CNRS ; Laboratoire de Synthèse et Physico-Chimie de Molécules d'Intérêt Biologique, SPCMIB, UMR 5068, 118, route de Narbonne, F-31062 Toulouse cedex 9, France,

<sup>3</sup> Université de Toulouse ; UPS ; Laboratoire de Synthèse et Physico-Chimie de Molécules d'Intérêt Biologique, SPCMIB, UMR 5068, 118, route de Narbonne, F-31062 Toulouse cedex 9, France,

<sup>4</sup> Université de Toulouse ; UPS and CNRS; Institut de Chimie de Toulouse, FR2599, 118, route de Narbonne, F-31062 Toulouse cedex 9, France,

**Figure S1.** The molecular structure of **2a**.

**Figure S2.** Intermolecular “chlorophenyl-triazoly”  $\pi$ - $\pi$  stacking interactions for **3a**

**Figure S3** Emission spectra in methanol for **3b** and **3c**

**Table S1.** Experimental bond lengths [ $\text{\AA}$ ] and angles [ $^\circ$ ] for **2a**

**Table S2.** Hydrogen bonds for **3a** and **3b**.

**Table S3.** Theoretical bond lengths [ $\text{\AA}$ ] and angles [ $^\circ$ ] for **3c** (in MeOH)

**Table S4.** Selected wavelengths ( $\lambda$ ), calculated excitation energies (E), oscillator strengths ( $\times c4$ ), and dominant excitation character for low-lying singlet ( $S_n$ ) and triplet ( $T_n$ ) states of **3a**.

**Table S5.** Selected wavelengths ( $\lambda$ ), calculated excitation energies (E), oscillator strengths ( $\times c4$ ), and dominant excitation character for low-lying singlet ( $S_n$ ) and triplet ( $T_n$ ) states of **3b**.

**Table S6.** Selected wavelengths ( $\lambda$ ), calculated excitation energies (E), oscillator strengths ( $\times c4$ ), and dominant excitation character for low-lying singlet ( $S_n$ ) and triplet ( $T_n$ ) states of **3c**.

**Table S7.** Four low-lying singlet excited states of the three Re-complexes corresponding to the lowest singlet  $^1S_1$  state optimized geometries with the TDDFT/B3LYP method.

**Table S8.** The optimized Cartesian coordinates for all calculated states of **3a**.

**Table S9.** The optimized Cartesian coordinates for all calculated states of **3b**.

**Table S10.** The optimized Cartesian coordinates for all calculated states of **3c**.

**Figure S1.** The molecular structure of **2a**. Displacement ellipsoids are drawn at 50% probability. Hydrogen atoms are omitted for clarity.

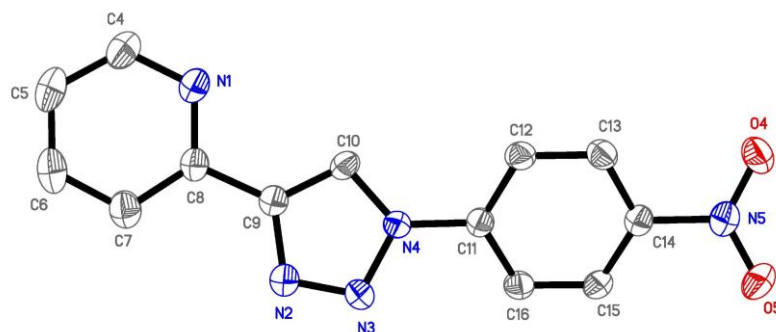

**Figure S2.** Intermolecular “chlorophenyl-triazolyl”  $\pi$ - $\pi$  stacking interactions for **3a** (centroid-centroid distance of 3.792 Å). The solvent molecules were omitted for clarity.

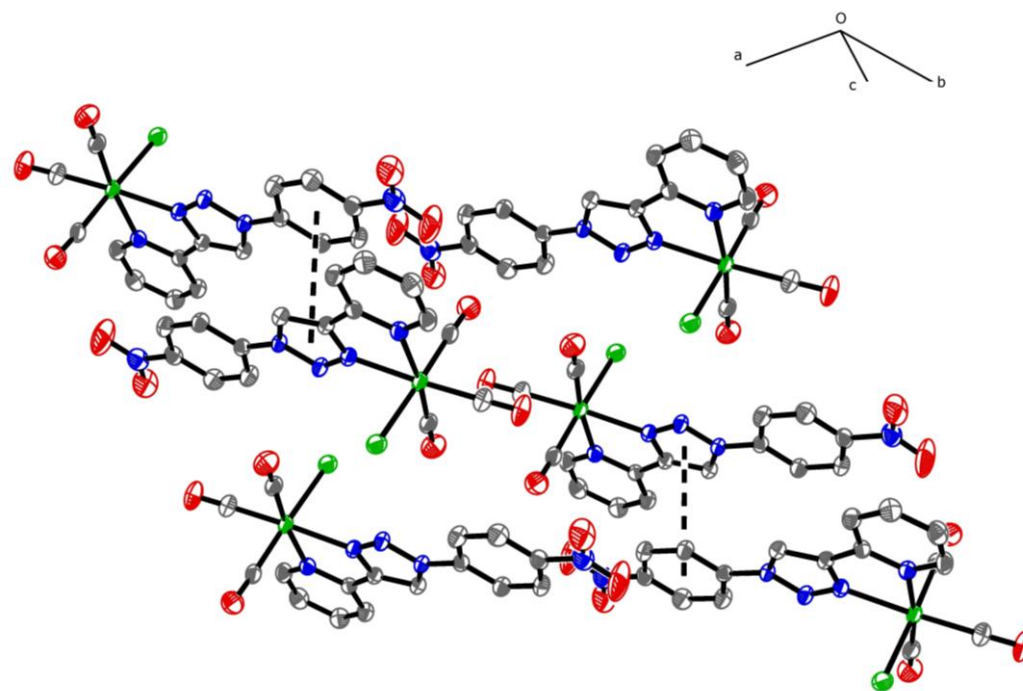

**Figure S3.** Room temperature emission spectra in methanol for **3b** (top) and **3c** (bottom)

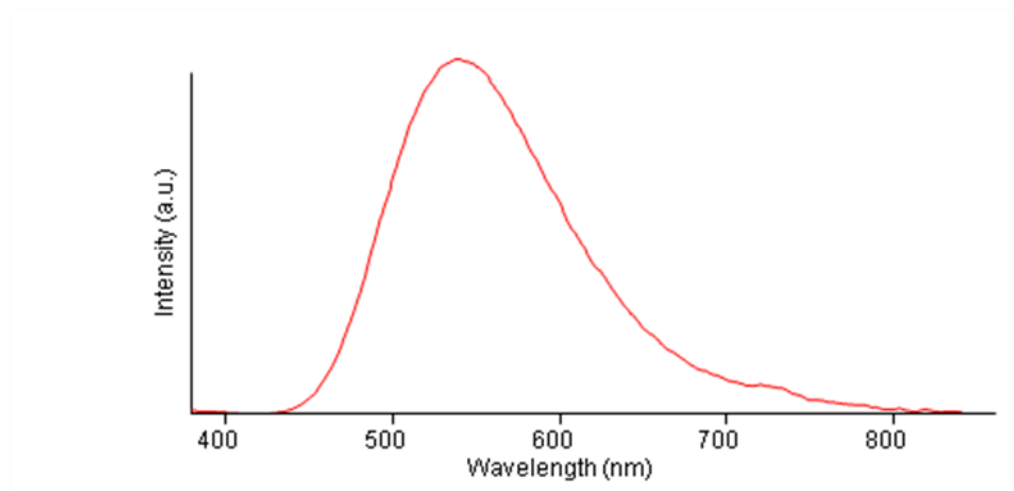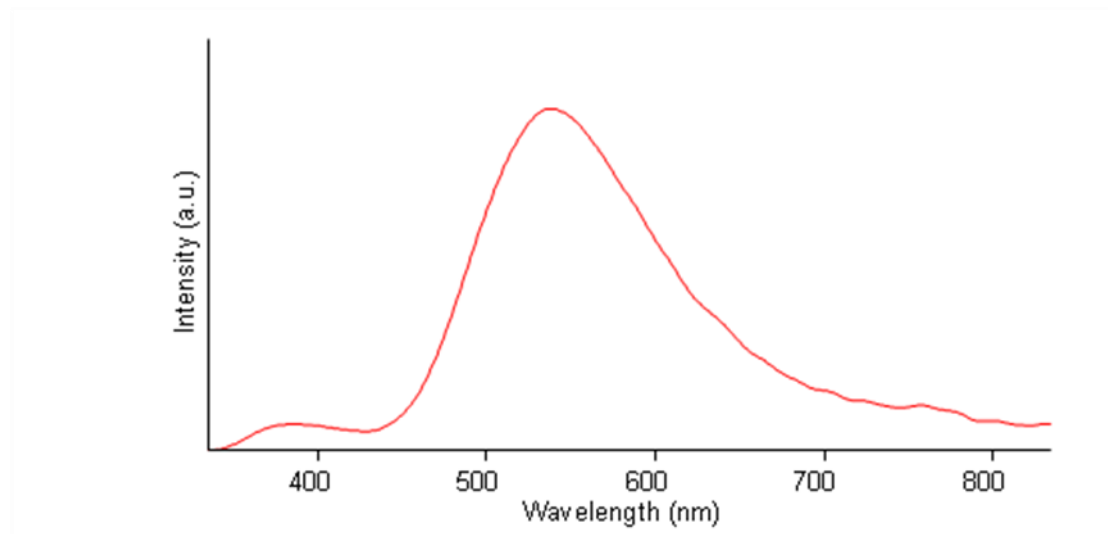

**Table S1.** Selected experimental bond lengths [Å] and angles [°] for **2a**

| Bond Lengths    |            |                  |            |
|-----------------|------------|------------------|------------|
| N(2)-N(3)       | 1.307(2)   | C(9)-C(10)       | 1.359(3)   |
| N(3)-N(4)       | 1.360(2)   | C(10)-N(4)       | 1.355(2)   |
| N(4)-C(11)      | 1.428(2)   | C(9)-C(8)        | 1.474(2)   |
| N(2)-C(9)       | 1.369(2)   |                  |            |
| Bond Angles     |            |                  |            |
| C(9)-N(2)-N(3)  | 108.98(15) | C(10)-C(9)-N(2)  | 108.50(16) |
| N(2)-N(3)-N(4)  | 107.23(14) | C(9)-C(8)-N(1)   | 115.09(16) |
| N(3)-N(4)-C(10) | 110.15(15) | C(12)-C(11)-N(4) | 119.46(16) |
| N(4)-C(10)-C(9) | 105.14(16) |                  |            |

**Table S2.** Hydrogen bonds for **3a** and **3b**.

| D              | A       | D—H [Å] | H···A [Å] | D···A [Å] | D—H···A [°] |
|----------------|---------|---------|-----------|-----------|-------------|
| 3a             |         |         |           |           |             |
| C(5)-H(5A)...  | O(5)#1  | 0.95    | 2.59      | 3.279(4)  | 129.8       |
| C(10)-H(10)... | O(6)#2  | 0.95    | 2.16      | 3.088(3)  | 167.0       |
| C(12)H(12)...  | O(6)#2  | 0.95    | 2.39      | 3.329(4)  | 171.5       |
| C(16)H(16)...  | N(3)    | 0.95    | 2.43      | 2.757(3)  | 99.7        |
| C(16)H(16)...  | Cl(1)#3 | 0.95    | 2.83      | 3.693(3)  | 151.7       |
| C(19)H(19B)... | O(1)#4  | 0.98    | 2.48      | 3.343(4)  | 147.0       |
| 3b             |         |         |           |           |             |
| O(99)-H(99)... | Cl(1)#1 | 0.82    | 2.35      | 3.164(4)  | 174.6       |
| C(6)-H(6)...   | O(1)#2  | 0.93    | 2.43      | 3.253(6)  | 147.1       |

|                       |      |      |          |       |
|-----------------------|------|------|----------|-------|
| C(7)-H(7)...Cl(1)#3   | 0.93 | 2.73 | 3.507(5) | 142.2 |
| C(10)-H(10)...O(99)#4 | 0.93 | 2.39 | 3.301(5) | 167.4 |
| C(12)-H(12)...O(99)#4 | 0.93 | 2.44 | 3.358(6) | 171.0 |
| C(16)-H(16)...N(3)    | 0.93 | 2.46 | 2.776(5) | 100.1 |

---

Symmetry transformations used to generate equivalent atoms:

#1 x,y+1,z; #2 x,y-1,z+1; #3 -x+1,-y,-z+1; #4 -x+1,-y+1,-z+1



**Table S3.** The theoretical bond lengths [Å] and angles [°] for **3c** (in MeOH)

| Bond lengths | Optimized      |                |                | Bond angles      | Optimized      |                |                |
|--------------|----------------|----------------|----------------|------------------|----------------|----------------|----------------|
|              | S <sub>0</sub> | S <sub>1</sub> | T <sub>1</sub> |                  | S <sub>0</sub> | S <sub>1</sub> | T <sub>1</sub> |
| Re(1)-C(1)   | 1.925          | 1.932          | 1.923          | C(1)-Re(1)-C(2)  | 90.18          | 90.31          | 90.28          |
| Re(1)-C(2)   | 1.928          | 1.941          | 1.933          | C(1)-Re(1)-C(3)  | 90.92          | 91.49          | 90.90          |
| Re(1)-C(3)   | 1.910          | 1.907          | 1.906          | C(2)-Re(1)-C(3)  | 90.95          | 90.31          | 91.04          |
| Re(1)-N(2)   | 2.180          | 2.137          | 2.153          | C(1)-Re(1)-N(2)  | 97.51          | 96.70          | 97.42          |
| Re(1)-N(1)   | 2.247          | 2.195          | 2.244          | C(2)-Re(1)-N(2)  | 171.10         | 171.46         | 170.95         |
| Re(1)-Cl(1)  | 2.556          | 2.611          | 2.582          | C(3)-Re(1)-N(2)  | 93.34          | 93.48          | 93.57          |
| O(1)-C(1)    | 1.163          | 1.167          | 1.165          | C(1)-Re(1)-N(1)  | 170.85         | 171.06         | 170.84         |
| O(2)-C(2)    | 1.164          | 1.164          | 1.166          | C(2)-Re(1)-N(1)  | 98.08          | 97.20          | 97.80          |
| O(3)-C(3)    | 1.167          | 1.168          | 1.169          | C(3)-Re(1)-N(1)  | 92.87          | 93.20          | 93.25          |
|              |                |                |                | N(2)-Re(1)-N(1)  | 73.96          | 75.43          | 74.19          |
|              |                |                |                | C(1)-Re(1)-Cl(1) | 91.65          | 89.81          | 91.49          |
|              |                |                |                | C(2)-Re(1)-Cl(1) | 91.08          | 89.35          | 90.04          |
|              |                |                |                | C(3)-Re(1)-Cl(1) | 176.72         | 178.58         | 177.38         |

|  |  |  |  |                  |        |               |        |
|--|--|--|--|------------------|--------|---------------|--------|
|  |  |  |  | N(2)-Re(1)-Cl(1) | 84.31  | <i>85.81</i>  | 85.05  |
|  |  |  |  | N(1)-Re(1)-Cl(1) | 84.30  | <i>85.44</i>  | 84.23  |
|  |  |  |  | O(1)-C(1)-Re(1)  | 178.59 | <i>178.77</i> | 178.63 |
|  |  |  |  | O(2)-C(2)-Re(1)  | 179.16 | <i>179.48</i> | 179.17 |
|  |  |  |  | O(3)-C(3)-Re(1)  | 179.88 | <i>179.80</i> | 179.94 |

In the following Tables **S4** to **S6**, are presented selected DFT calculations for each complex including wavelengths ( $\lambda$ ), calculated excitation energies (E), oscillator strengths ( $\times c4$ ), and dominant excitation character for low-lying singlet ( $S_n$ ) and triplet ( $T_n$ ) states.

**Table S4.** Selected data for complex **3a**.

| State                         | Excitations           | $\lambda_{\text{exp}}$ , nm | $E_{\text{cal}}$ , eV | $\lambda_{\text{cal}}$ , nm | $\times c4_{\text{cal}}$ | Character                                              |
|-------------------------------|-----------------------|-----------------------------|-----------------------|-----------------------------|--------------------------|--------------------------------------------------------|
| <i>Singlet Excited States</i> |                       |                             |                       |                             |                          |                                                        |
| $S_1$                         | H $\rightarrow$ L     |                             | 2.71                  | 457.2                       | 0.0222                   | d/ $\pi$ (Cl) $\rightarrow$ $\pi^*$ (L) (MLCT/LLCT)    |
| $S_2$                         | H-1 $\rightarrow$ L   |                             | 2.80                  | 442.5                       | 0.0390                   | d/ $\pi$ (Cl) $\rightarrow$ $\pi^*$ (L) (MLCT/LLCT)    |
| $S_3$                         | H-2 $\rightarrow$ L   |                             | 3.24                  | 382.9                       | 0.0025                   | d $\rightarrow$ $\pi^*$ (L) (MLCT)                     |
| $S_4$                         | H $\rightarrow$ L+1   |                             | 3.27                  | 378.7                       | 0.0028                   | d/ $\pi$ (Cl) $\rightarrow$ $\pi^*$ (L) (MLCT/LLCT)    |
| $S_5$                         | H-1 $\rightarrow$ L+1 | 330                         | 3.43                  | 361.7                       | 0.0734                   | d/ $\pi$ (Cl) $\rightarrow$ $\pi^*$ (L) (MLCT/LLCT)    |
| $S_6$                         | H-3 $\rightarrow$ L   |                             | 3.65                  | 340.1                       | 0.2394                   | $\pi$ (L) $\rightarrow$ $\pi^*$ (L) (IL)               |
| $S_7$                         | H-9 $\rightarrow$ L   |                             | 3.71                  | 333.9                       | 0.0084                   | $\pi$ (L) $\rightarrow$ $\pi^*$ (L) (IL)               |
| $S_8$                         | H-2 $\rightarrow$ L+1 |                             | 3.75                  | 331.0                       | 0.0005                   | d $\rightarrow$ $\pi^*$ (L) (MLCT)                     |
| $S_9$                         | H $\rightarrow$ L+2   |                             | 3.92                  | 316.3                       | 0.0112                   | d/ $\pi$ (Cl) $\rightarrow$ $\pi^*$ (L) (MLCT/LLCT)    |
| $S_{10}$                      | H-1 $\rightarrow$ L+2 |                             | 4.02                  | 308.6                       | 0.0401                   | d/ $\pi$ (Cl) $\rightarrow$ $\pi^*$ (L) (MLCT/LLCT)    |
| $S_{11}$                      | H-1 $\rightarrow$ L+2 |                             | 4.02                  | 308.5                       | 0.1337                   | d/ $\pi$ (Cl) $\rightarrow$ $\pi^*$ (L) (MLCT/LLCT)    |
| $S_{12}$                      | H-6 $\rightarrow$ L   |                             | 4.05                  | 306.0                       | 0.0339                   | $\pi$ (L) $\rightarrow$ $\pi^*$ (L) (IL)               |
| $S_{20}$                      | H-7 $\rightarrow$ L   | 296                         | 4.38                  | 282.8                       | 0.4263                   | $\pi$ (L)/ $\pi$ (Cl) $\rightarrow$ $\pi^*$ (L) (LLCT) |
| $S_{27}$                      | H-4 $\rightarrow$ L+1 |                             | 4.73                  | 262.2                       | 0.0408                   | $\pi$ (Cl)/ $\pi$ (L) $\rightarrow$ $\pi^*$ (L) (LLCT) |
| $S_{31}$                      | H-2 $\rightarrow$ L+5 |                             | 4.88                  | 254.2                       | 0.0484                   | d $\rightarrow$ $\pi^*$ (CO)/d (LF/LMCT)               |
| $S_{32}$                      | H-3 $\rightarrow$ L+2 | 267                         | 4.97                  | 249.6                       | 0.1802                   | $\pi$ (L) $\rightarrow$ $\pi^*$ (L) (IL)               |
| $S_{37}$                      | H-7 $\rightarrow$ L+1 |                             | 5.28                  | 234.8                       | 0.0799                   | $\pi$ (L)/ $\pi$ (Cl) $\rightarrow$ $\pi^*$ (L) (LLCT) |
| $S_{48}$                      | H-4 $\rightarrow$ L+3 | 227                         | 5.55                  | 223.3                       | 0.0724                   | $\pi$ (Cl)/ $\pi$ (L) $\rightarrow$ $\pi^*$ (L) (LLCT) |
| $S_{49}$                      | H-3 $\rightarrow$ L+4 |                             | 5.56                  | 223.0                       | 0.0417                   | $\pi$ (L) $\rightarrow$ $\pi^*$ (L) (IL)               |
| $S_{59}$                      | H-3 $\rightarrow$ L+6 |                             | 5.77                  | 215.0                       | 0.0316                   | $\pi$ (L) $\rightarrow$ $\pi^*$ (CO)/d (LMCT/LLCT)     |

|                               |          |     |      |       |        |                                                        |
|-------------------------------|----------|-----|------|-------|--------|--------------------------------------------------------|
| S <sub>60</sub>               | H-12→L   |     | 5.78 | 214.6 | 0.0781 | $\pi(L) \rightarrow \pi^*(L)$ (IL)                     |
| S <sub>66</sub>               | H-4→L+4  |     | 5.94 | 208.6 | 0.0328 | $\pi(Cl)/\pi(L) \rightarrow \pi^*(L)$ (LLCT)           |
| S <sub>87</sub>               | H-8→L+3  |     | 6.27 | 197.7 | 0.0839 | $\pi(Cl) \rightarrow \pi^*(L)$ (LLCT)                  |
| S <sub>89</sub>               | H-10→L+1 |     | 6.35 | 195.4 | 0.0483 | $\pi(L)/\pi(Cl) \rightarrow \pi^*(L)$ (LLCT)           |
|                               | H-8→L+3  |     |      |       |        | $\pi(Cl) \rightarrow \pi^*(L)$ (LLCT)                  |
| S <sub>92</sub>               | H-6→L+4  | 205 | 6.41 | 193.3 | 0.1791 | $\pi(L) \rightarrow \pi^*(L)$ (IL)                     |
| S <sub>98</sub>               | H-3→L+7  |     | 6.52 | 190.2 | 0.1731 | $\pi(L) \rightarrow \pi^*(L)$ (IL)                     |
| S <sub>100</sub>              | H-7→L+5  |     | 6.52 | 190.0 | 0.0802 | $\pi(L)/\pi(Cl) \rightarrow \pi^*(CO)/d$ (LMCT/LLCT)   |
| S <sub>101</sub>              | H-7→L+5  |     | 6.54 | 189.7 | 0.0461 | $\pi(L)/\pi(Cl) \rightarrow \pi^*(CO)/d$ (LMCT/LLCT)   |
| S <sub>108</sub>              | H-7→L+6  |     | 6.60 | 187.7 | 0.0353 | $\pi(L)/\pi(Cl) \rightarrow \pi^*(CO)/d$ (LMCT/LLCT)   |
| S <sub>110</sub>              | H-13→L+2 |     | 6.62 | 187.4 | 0.1109 | $\pi(L) \rightarrow \pi^*(L)$ (IL)                     |
| S <sub>111</sub>              | H-1→L+19 |     | 6.64 | 186.8 | 0.0576 | $d/\pi(Cl) \rightarrow d/\pi^*(CO)$ (LF/LLCT)          |
| S <sub>119</sub>              | H-1→L+19 |     | 6.72 | 184.6 | 0.0355 | $d/\pi(Cl) \rightarrow d/\pi^*(CO)$ (LF/LLCT)          |
| S <sub>122</sub>              | H-8→L+6  |     | 6.77 | 183.1 | 0.0693 | $\pi(Cl) \rightarrow \pi^*(CO)/d$ (LMCT/LLCT)          |
| S <sub>123</sub>              | H-11→L+2 |     | 6.79 | 182.6 | 0.1057 | $\pi(L) \rightarrow \pi^*(L)$ (IL)                     |
| S <sub>125</sub>              | H→L+17   |     | 6.80 | 182.3 | 0.0429 | $d/\pi(Cl) \rightarrow d/\pi^*(L)/\pi^*(CO)$ (LF/LLCT) |
| <i>Triplet excited states</i> |          |     |      |       |        |                                                        |
| T <sub>1</sub>                | H→L      |     | 2.67 | 464.7 | 0.0000 | $d/\pi(Cl) \rightarrow \pi^*(L)$ (MLCT/LLCT)           |
| T <sub>2</sub>                | H-1→L    |     | 2.76 | 449.1 | 0.0000 | $d/\pi(Cl) \rightarrow \pi^*(L)$ (MLCT/LLCT)           |
| T <sub>3</sub>                | H-13→L   |     | 2.88 | 430.7 | 0.0000 | $\pi(L) \rightarrow \pi^*(L)$ (IL)                     |
| T <sub>4</sub>                | H-3→L    |     | 3.03 | 409.7 | 0.0000 | $\pi(L) \rightarrow \pi^*(L)$ (IL)                     |
| T <sub>5</sub>                | H→L+1    |     | 3.09 | 400.9 | 0.0000 | $d/\pi(Cl) \rightarrow \pi^*(L)$ (MLCT/LLCT)           |

**Table S5.** Selected data for complex **3b**.

| State                         | Excitations | $\lambda_{\text{exp}}$ ,<br>nm | $E_{\text{cal}}$ , eV | $\lambda_{\text{cal}}$ , nm | $\times c4_{\text{cal}}$ | Character                  |
|-------------------------------|-------------|--------------------------------|-----------------------|-----------------------------|--------------------------|----------------------------|
| <i>Singlet excited states</i> |             |                                |                       |                             |                          |                            |
| S <sub>1</sub>                | H→L         |                                | 3.29                  | 377.1                       | 0.0036                   | d/π(Cl)→π*(L) (MLCT/LLCT)  |
| S <sub>2</sub>                | H-1→L       |                                | 3.44                  | 360.2                       | 0.0723                   | d/π(Cl)→π*(L) (MLCT/LLCT)  |
| S <sub>3</sub>                | H-2→L       |                                | 3.76                  | 330.1                       | 0.0009                   | d→π*(L) (MLCT)             |
| S <sub>4</sub>                | H→L+1       |                                | 3.78                  | 327.7                       | 0.0413                   | d/π(Cl)→π*(L) (MLCT/LLCT)  |
| S <sub>5</sub>                | H-1→L+1     | 320                            | 3.87                  | 320.5                       | 0.0694                   | d/π(Cl)→π*(L) (MLCT/LLCT)  |
| S <sub>6</sub>                | H→L+2       |                                | 4.17                  | 297.3                       | 0.0159                   | d/π(Cl)→π*(L) (MLCT/LLCT)  |
| S <sub>7</sub>                | H-1→L+4     |                                | 4.19                  | 296.1                       | 0.0021                   | d/π(Cl)→π*(CO)/d (LF/LLCT) |
| S <sub>8</sub>                | H→L+4       |                                | 4.21                  | 294.5                       | 0.0159                   | d/π(Cl)→π*(CO)/d (LF/LLCT) |
| S <sub>9</sub>                | H-1→L+2     |                                | 4.24                  | 292.5                       | 0.0136                   | d/π(Cl)→π*(L) (MLCT/LLCT)  |
| S <sub>10</sub>               | H-2→L+1     |                                | 4.29                  | 289.2                       | 0.0023                   | d→π*(L) (MLCT)             |
| S <sub>12</sub>               | H-3→L       | 295                            | 4.35                  | 285.3                       | 0.1431                   | π(L)→π*(L) (IL)            |
| S <sub>13</sub>               | H-3→L+1     | 264                            | 4.60                  | 269.2                       | 0.6147                   | π(L)→π*(L) (IL)            |
| S <sub>15</sub>               | H-4→L       |                                | 4.65                  | 266.4                       | 0.1363                   | π(L)→π*(L) (IL)            |
| S <sub>26</sub>               | H-5→L+1     |                                | 5.13                  | 241.8                       | 0.0539                   | π(Cl)→π*(L) (LLCT)         |
| S <sub>37</sub>               | H-8→L       | 226                            | 5.49                  | 226.0                       | 0.0550                   | π(Cl)→π*(L) (LLCT)         |
| S <sub>38</sub>               | H-1→L+13    |                                | 5.53                  | 224.3                       | 0.0446                   | d/π(Cl)→d/π*(L) (LF/LLCT)  |
| S <sub>39</sub>               | H-3→L+3     |                                | 5.54                  | 223.9                       | 0.0563                   | π(L)→π*(L) (IL)            |
| S <sub>43</sub>               | H-3→L+5     |                                | 5.64                  | 219.7                       | 0.0471                   | π(L)→d/π*(CO) (LMCT/LLCT)  |
| S <sub>74</sub>               | H-8→L+2     |                                | 6.25                  | 198.3                       | 0.0485                   | π(Cl)→π*(L) (LLCT)         |
| S <sub>85</sub>               | H-10→L+1    |                                | 6.42                  | 193.1                       | 0.0420                   | π(L)→π*(L) (IL)            |
| S <sub>88</sub>               | H-11→L+1    | 210                            | 6.48                  | 191.4                       | 0.1387                   | π(L)→π*(L) (IL)            |
| S <sub>89</sub>               | H→L+15      |                                | 6.48                  | 191.3                       | 0.0739                   | d/π(Cl)→d/π*(L) (LF/LLCT)  |
| S <sub>94</sub>               | H→L+19      |                                | 6.56                  | 189.0                       | 0.0793                   | d/π(Cl)→d/π*(L) (LF/LLCT)  |
| S <sub>95</sub>               | H→L+18      |                                | 6.57                  | 188.8                       | 0.0443                   | d/π(Cl)→d/π*(CO) (LF/LLCT) |

|                               |          |      |       |        |                                                                             |
|-------------------------------|----------|------|-------|--------|-----------------------------------------------------------------------------|
| S <sub>97</sub>               | H-5→L+6  | 6.60 | 187.8 | 0.0503 | $\pi(\text{Cl})/\pi(\text{L})/d \rightarrow \pi^*(\text{L})$ (LMCT/LLCT/IL) |
| S <sub>98</sub>               | H-5→L+6  | 6.60 | 187.7 | 0.1323 | $\pi(\text{Cl})/\pi(\text{L})/d \rightarrow \pi^*(\text{L})$ (LMCT/LLCT/IL) |
| S <sub>99</sub>               | H-5→L+6  | 6.62 | 187.2 | 0.0579 | $\pi(\text{Cl})/\pi(\text{L})/d \rightarrow \pi^*(\text{L})$ (LMCT/LLCT/IL) |
| S <sub>101</sub>              | H-7→L+6  | 6.65 | 186.3 | 0.2868 | $\pi(\text{Cl})/d/\pi(\text{L}) \rightarrow \pi^*(\text{L})$ (LMCT/LLCT/IL) |
| S <sub>102</sub>              | H-7→L+6  | 6.66 | 186.1 | 0.1204 | $\pi(\text{Cl})/d/\pi(\text{L}) \rightarrow \pi^*(\text{L})$ (LMCT/LLCT/IL) |
| S <sub>103</sub>              | H-11→L+1 | 6.67 | 185.8 | 0.0940 | $\pi(\text{L}) \rightarrow \pi^*(\text{L})$ (IL)                            |
|                               | H-8→L+5  |      |       |        | $\pi(\text{Cl}) \rightarrow d/\pi^*(\text{CO})$ (LMCT/LLCT)                 |
| S <sub>104</sub>              | H-6→L+6  | 6.69 | 185.2 | 0.0753 | $\pi(\text{L}) \rightarrow \pi^*(\text{L})$ (IL)                            |
| S <sub>109</sub>              | H-13→L+2 | 6.74 | 183.9 | 0.0405 | $\pi(\text{L}) \rightarrow \pi^*(\text{L})$ (IL)                            |
| S <sub>110</sub>              | H-12→L+1 | 6.75 | 183.8 | 0.0743 | $\pi(\text{L}) \rightarrow \pi^*(\text{L})$ (IL)                            |
|                               | H-3→L+11 |      |       |        | $\pi(\text{L}) \rightarrow d/\pi^*(\text{L})$ (LMCT/IL)                     |
| S <sub>111</sub>              | H-1→L+17 | 6.76 | 183.3 | 0.0431 | $d/\pi(\text{Cl}) \rightarrow \pi^*(\text{L})/d$ (LF/LLCT)                  |
| S <sub>112</sub>              | H-8→L+5  | 6.77 | 183.1 | 0.1326 | $\pi(\text{Cl}) \rightarrow d/\pi^*(\text{CO})$ (LMCT/LLCT)                 |
| S <sub>113</sub>              | H-12→L+1 | 6.77 | 182.9 | 0.0955 | $\pi(\text{L}) \rightarrow \pi^*(\text{L})$ (IL)                            |
| S <sub>114</sub>              | H-4→L+7  | 6.78 | 182.6 | 0.0539 | $\pi(\text{L}) \rightarrow \pi^*(\text{CO})$ (LLCT)                         |
|                               | H-1→L+24 |      |       |        | $d/\pi(\text{Cl}) \rightarrow \pi^*(\text{L})/d$ (LF/LLCT)                  |
| <i>Triplet excited states</i> |          |      |       |        |                                                                             |
| T <sub>1</sub>                | H→L      | 3.10 | 400.0 | 0.0000 | $d/\pi(\text{Cl}) \rightarrow \pi^*(\text{L})$ (MLCT/LLCT)                  |
| T <sub>2</sub>                | H-1→L    | 3.23 | 384.1 | 0.0000 | $d/\pi(\text{Cl}) \rightarrow \pi^*(\text{L})$ (MLCT/LLCT)                  |
| T <sub>3</sub>                | H-3→L+1  | 3.39 | 366.0 | 0.0000 | $\pi(\text{L}) \rightarrow \pi^*(\text{L})$ (IL)                            |
| T <sub>4</sub>                | H-4→L    | 3.41 | 363.5 | 0.0000 | $\pi(\text{L}) \rightarrow \pi^*(\text{L})$ (IL)                            |
|                               | H-3→L    |      |       |        | $\pi(\text{L}) \rightarrow \pi^*(\text{L})$ (IL)                            |
| T <sub>5</sub>                | H-2→L    | 3.68 | 336.5 | 0.0000 | $d \rightarrow \pi^*(\text{L})$ (MLCT)                                      |

**Table S6.** Selected data for complex **3c**.

| State                         | Excitations | $\lambda_{\text{exp}}$ ,<br>nm | $E_{\text{cal}}$ , eV | $\lambda_{\text{cal}}$ , nm | $\times C_{\text{cal}}$ | Character                                        |
|-------------------------------|-------------|--------------------------------|-----------------------|-----------------------------|-------------------------|--------------------------------------------------|
| <i>Singlet excited states</i> |             |                                |                       |                             |                         |                                                  |
| S <sub>1</sub>                | H→L         | 3.25                           | 381.6                 | 0.0030                      |                         | $\pi(\text{L}) \rightarrow \pi^*(\text{L})$ (IL) |

|                  |          |     |      |       |        |                              |
|------------------|----------|-----|------|-------|--------|------------------------------|
| S <sub>2</sub>   | H-1→L    |     | 3.41 | 363.6 | 0.0448 | d/π(Cl)→π*(L) (MLCT/LLCT)    |
| S <sub>3</sub>   | H-2→L    |     | 3.51 | 353.2 | 0.0429 | d/π(Cl)→π*(L) (MLCT/LLCT)    |
| S <sub>4</sub>   | H-3→L    |     | 3.78 | 328.0 | 0.0112 | d→π*(L) (MLCT)               |
| S <sub>5</sub>   | H→L+1    |     | 3.83 | 323.9 | 0.4871 | π(L)→π*(L) (IL)              |
| S <sub>6</sub>   | H-1→L+1  | 300 | 4.04 | 307.1 | 0.0231 | d/π(Cl)→π*(L) (MLCT/LLCT)    |
| S <sub>7</sub>   | H→L+2    |     | 4.11 | 301.6 | 0.0423 | π(L)→π*(L) (IL)              |
| S <sub>8</sub>   | H-2→L+1  |     | 4.14 | 299.5 | 0.0183 | d/π(Cl)→π*(L) (MLCT/LLCT)    |
| S <sub>9</sub>   | H-2→L+3  |     | 4.18 | 296.7 | 0.0050 | d/π(Cl)→π*(CO)/d (MLCT/LLCT) |
| S <sub>10</sub>  | H-1→L+3  |     | 4.20 | 295.0 | 0.0112 | d/π(Cl)→π*(CO)/d (MLCT/LLCT) |
| S <sub>25</sub>  | H-3→L+3  |     | 4.88 | 254.0 | 0.0719 | d→π*(CO)/d (MLCT/LLCT)       |
| S <sub>26</sub>  | H-4→L+1  | 258 | 5.14 | 241.2 | 0.1514 | π(L)→π*(L) (IL)              |
| S <sub>31</sub>  | H-4→L+2  |     | 5.28 | 235.0 | 0.1037 | π(L)→π*(L) (IL)              |
| S <sub>35</sub>  | H→L+7    | 227 | 5.42 | 228.8 | 0.0912 | π(L)→π*(L)/π*(CO) (LLCT/IL)  |
| S <sub>39</sub>  | H-8→L    |     | 5.51 | 225.0 | 0.0414 | π(Cl)→π*(L) (LLCT)           |
| S <sub>47</sub>  | H-7→L+2  |     | 5.67 | 218.6 | 0.0381 | π(Cl)→π*(L) (LLCT)           |
| S <sub>81</sub>  | H-8→L+2  |     | 6.28 | 197.3 | 0.0442 | π(Cl)→π*(L) (LLCT)           |
| S <sub>83</sub>  | H-11→L   |     | 6.32 | 196.2 | 0.0373 | π(L)→π*(L) (IL)              |
| S <sub>91</sub>  | H-9→L+1  | 209 | 6.45 | 192.3 | 0.5366 | π(L)→π*(L) (IL)              |
| S <sub>92</sub>  | H-3→L+11 |     | 6.47 | 191.6 | 0.0744 | d→d/π*(CO) (LF/LLCT)         |
| S <sub>99</sub>  | H-4→L+6  |     | 6.55 | 189.4 | 0.0619 | π(L)→π*(CO)/π*(L) (LLCT/IL)  |
| S <sub>100</sub> | H-4→L+6  |     | 6.56 | 189.1 | 0.1015 | π(L)→π*(CO)/π*(L) (LLCT/IL)  |
|                  | H-5→L+5  |     |      |       |        | π(L)→π*(L) (IL)              |
| S <sub>106</sub> | H-5→L+7  |     | 6.62 | 187.4 | 0.0933 | π(L)→π*(L)/π*(CO) (LLCT/IL)  |
| S <sub>107</sub> | H-4→L+7  |     | 6.63 | 186.9 | 0.0744 | π(L)→π*(L)/π*(CO) (LLCT/IL)  |
| S <sub>110</sub> | H-4→L+8  |     | 6.68 | 185.7 | 0.0826 | π(L)→π*(L)/π*(CO) (LLCT/IL)  |
| S <sub>117</sub> | H-12→L+2 |     | 6.76 | 183.5 | 0.0472 | π(L)→π*(L) (IL)              |
| S <sub>121</sub> | H-3→L+12 |     | 6.82 | 181.9 | 0.0613 | d→d/π*(CO) (LF/LLCT)         |
| S <sub>122</sub> | H-10→L+1 |     | 6.82 | 181.7 | 0.0564 | π(L)→π*(L) (IL)              |
| S <sub>123</sub> | H→L+22   |     | 6.83 | 181.5 | 0.0501 | π(L)→π*(L)/π*(CO) (LLCT/IL)  |

---

*Triplet excited states*

---

|                |       |      |       |        |                           |
|----------------|-------|------|-------|--------|---------------------------|
| T <sub>1</sub> | H→L   | 3.04 | 407.4 | 0.0000 | π(L)→π*(L) (IL)           |
| T <sub>2</sub> | H→L+1 | 3.13 | 396.5 | 0.0000 | π(L)→π*(L) (IL)           |
| T <sub>3</sub> | H-2→L | 3.22 | 385.2 | 0.0000 | d/π(Cl)→π*(L) (MLCT/LLCT) |
| T <sub>4</sub> | H-1→L | 3.34 | 370.9 | 0.0000 | d/π(Cl)→π*(L) (MLCT/LLCT) |
|                | H-2→L |      |       |        | d/π(Cl)→π*(L) (MLCT/LLCT) |
| T <sub>5</sub> | H-4→L | 3.51 | 353.4 | 0.0000 | π(L)→π*(L) (IL)           |

---



**Table S7.** Four low-lying singlet excited states of the three Re-complexes corresponding to the lowest singlet  $^1S_1$  state optimized geometries with the TDDFT/B3LYP method.

| State     | Excitations | $E_{cal}$ , eV | $\lambda_{cal}$ , nm | $\times c4_{cal}$ | Character                              |
|-----------|-------------|----------------|----------------------|-------------------|----------------------------------------|
| <b>3a</b> |             |                |                      |                   |                                        |
| 1         | HOMO→LUMO   | 1.73           | 715.0                | 0.0204            | d/ $\pi$ (Cl)→ $\pi^*$ (L) (MLCT/LLCT) |
| 2         | H-1→LUMO    | 1.93           | 642.5                | 0.0490            | d/ $\pi$ (Cl)→ $\pi^*$ (L) (MLCT/LLCT) |
| 3         | H-2→LUMO    | 2.45           | 506.2                | 0.0062            | d→ $\pi^*$ (L) (MLCT)                  |
| 4         | HOMO→L+1    | 2.83           | 437.5                | 0.0193            | d/ $\pi$ (Cl)→ $\pi^*$ (L)             |
| <b>3b</b> |             |                |                      |                   |                                        |
| 1         | HOMO→LUMO   | 2.60           | 477.8                | 0.0033            | d/ $\pi$ (Cl)→ $\pi^*$ (L) (MLCT/LLCT) |
| 2         | H-1→LUMO    | 2.90           | 428.3                | 0.1272            | d/ $\pi$ (Cl)→ $\pi^*$ (L) (MLCT/LLCT) |
| 3         | H-2→LUMO    | 3.23           | 383.9                | 0.0017            | d→ $\pi^*$ (L) (MLCT)                  |
| 4         | HOMO→L+1    | 3.29           | 376.9                | 0.1040            | d/ $\pi$ (Cl)→ $\pi^*$ (L) (MLCT/LLCT) |
| <b>3c</b> |             |                |                      |                   |                                        |
| 1         | HOMO→LUMO   | 2.60           | 477.0                | 0.0336            | $\pi$ (L)/d→ $\pi^*$ (L) (LLCT/MLCT)   |
| 2         | H-1→LUMO    | 3.09           | 401.7                | 0.0441            | d/ $\pi$ (Cl)→ $\pi^*$ (L) (MLCT/LLCT) |
| 3         | HOMO→L+1    | 3.18           | 390.4                | 0.7395            | $\pi$ (L)/d→ $\pi^*$ (L) (LLCT/MLCT)   |
|           | H-2→LUMO    |                |                      |                   | d/ $\pi$ (Cl)→ $\pi^*$ (L) (MLCT/LLCT) |
| 4         | H-2→LUMO    | 3.25           | 382.0                | 0.3410            | d/ $\pi$ (Cl)→ $\pi^*$ (L) (MLCT/LLCT) |
|           | HOMO→L+1    |                |                      |                   | $\pi$ (L)/d→ $\pi^*$ (L) (LLCT/MLCT)   |

**Table S8.** The optimized Cartesian coordinates for all calculated states of **3a**.

| <b>S0</b> |              |              |              |
|-----------|--------------|--------------|--------------|
| 75        | -0.153371000 | 0.032855000  | 0.060718000  |
| 17        | 2.131703000  | -0.143196000 | -1.064233000 |
| 6         | -0.975828000 | 0.625915000  | -1.575835000 |
| 6         | 0.188939000  | 1.864806000  | 0.557846000  |
| 6         | -1.840649000 | 0.071271000  | 0.958781000  |
| 8         | -1.466272000 | 0.958737000  | -2.576204000 |
| 8         | 0.411966000  | 2.965419000  | 0.860445000  |
| 8         | -2.869962000 | 0.096693000  | 1.507901000  |
| 8         | -2.321169000 | -7.828018000 | -5.797027000 |
| 8         | -2.476745000 | -9.231934000 | -4.140913000 |
| 7         | 0.874553000  | -0.962770000 | 1.794004000  |
| 7         | -0.262100000 | -2.110224000 | -0.325319000 |
| 7         | -0.776522000 | -2.796829000 | -1.305351000 |
| 7         | -0.509103000 | -4.090301000 | -1.034375000 |
| 7         | -2.223439000 | -8.114909000 | -4.600748000 |
| 6         | 1.420253000  | -0.314285000 | 2.840067000  |
| 1         | 1.326266000  | 0.764832000  | 2.839878000  |
| 6         | 2.073383000  | -0.975016000 | 3.877172000  |
| 1         | 2.494498000  | -0.401087000 | 4.695257000  |
| 6         | 2.169836000  | -2.366741000 | 3.835994000  |
| 1         | 2.672261000  | -2.913040000 | 4.627865000  |
| 6         | 1.607864000  | -3.049359000 | 2.759091000  |
| 1         | 1.661914000  | -4.130781000 | 2.695591000  |
| 6         | 0.968534000  | -2.320580000 | 1.754624000  |
| 6         | 0.341360000  | -2.932180000 | 0.589279000  |
| 6         | 0.183321000  | -4.222100000 | 0.130709000  |

|           |              |              |              |
|-----------|--------------|--------------|--------------|
| 1         | 0.518347000  | -5.174384000 | 0.509261000  |
| 6         | -0.945102000 | -5.109575000 | -1.932849000 |
| 6         | -1.249715000 | -6.381168000 | -1.434798000 |
| 1         | -1.187328000 | -6.597754000 | -0.374336000 |
| 6         | -1.665718000 | -7.375208000 | -2.315600000 |
| 1         | -1.909402000 | -8.366057000 | -1.953616000 |
| 6         | -1.780446000 | -7.068651000 | -3.672339000 |
| 6         | -1.487998000 | -5.798878000 | -4.174652000 |
| 1         | -1.581720000 | -5.592988000 | -5.233501000 |
| 6         | -1.060703000 | -4.809499000 | -3.295193000 |
| 1         | -0.812286000 | -3.820474000 | -3.660575000 |
| <b>S1</b> |              |              |              |
| 75        | -0.107656000 | 0.011387000  | 0.066526000  |
| 17        | 1.967779000  | -0.075064000 | -1.144421000 |
| 6         | -1.057195000 | 0.678731000  | -1.531575000 |
| 6         | 0.188023000  | 1.888994000  | 0.530658000  |
| 6         | -1.807550000 | -0.038552000 | 1.084360000  |
| 8         | -1.616092000 | 1.054759000  | -2.460875000 |
| 8         | 0.368166000  | 2.995677000  | 0.793004000  |
| 8         | -2.792626000 | -0.067830000 | 1.672864000  |
| 8         | -2.186904000 | -7.871465000 | -5.857459000 |
| 8         | -2.583614000 | -9.240887000 | -4.116029000 |
| 7         | 0.900651000  | -0.957783000 | 1.781496000  |
| 7         | -0.242038000 | -2.109648000 | -0.319804000 |
| 7         | -0.771590000 | -2.790742000 | -1.305451000 |
| 7         | -0.514679000 | -4.081536000 | -1.039325000 |
| 7         | -2.197392000 | -8.103834000 | -4.588371000 |
| 6         | 1.454817000  | -0.300250000 | 2.820828000  |
| 1         | 1.373584000  | 0.779565000  | 2.810625000  |
| 6         | 2.103147000  | -0.959126000 | 3.859477000  |

|          |              |              |              |
|----------|--------------|--------------|--------------|
| 1        | 2.532878000  | -0.383323000 | 4.671171000  |
| 6        | 2.185442000  | -2.352352000 | 3.827467000  |
| 1        | 2.686169000  | -2.896046000 | 4.622016000  |
| 6        | 1.614654000  | -3.041933000 | 2.759651000  |
| 1        | 1.661658000  | -4.123639000 | 2.704150000  |
| 6        | 0.975293000  | -2.321910000 | 1.751081000  |
| 6        | 0.342435000  | -2.934621000 | 0.592754000  |
| 6        | 0.171687000  | -4.224659000 | 0.126367000  |
| 1        | 0.496144000  | -5.183843000 | 0.496965000  |
| 6        | -0.946875000 | -5.102863000 | -1.940699000 |
| 6        | -1.383641000 | -6.336878000 | -1.434963000 |
| 1        | -1.421432000 | -6.512517000 | -0.364189000 |
| 6        | -1.794430000 | -7.332538000 | -2.309073000 |
| 1        | -2.140575000 | -8.286835000 | -1.933838000 |
| 6        | -1.780931000 | -7.100933000 | -3.703992000 |
| 6        | -1.345816000 | -5.849748000 | -4.200091000 |
| 1        | -1.331498000 | -5.680146000 | -5.268959000 |
| 6        | -0.929409000 | -4.859841000 | -3.322989000 |
| 1        | -0.581164000 | -3.905230000 | -3.702339000 |
| <b>T</b> |              |              |              |
| 75       | 0.086095000  | -0.024477000 | -0.038790000 |
| 17       | 2.372256000  | -0.055859000 | -0.825887000 |
| 6        | -0.568719000 | 0.563361000  | -1.780984000 |
| 6        | 0.306892000  | 1.907715000  | 0.410141000  |
| 6        | -1.721575000 | 0.014732000  | 0.783367000  |
| 8        | -0.941791000 | 0.889793000  | -2.820836000 |
| 8        | 0.423346000  | 3.023700000  | 0.651182000  |
| 8        | -2.761890000 | 0.039245000  | 1.267109000  |
| 8        | -2.896729000 | -7.723610000 | -5.648339000 |
| 8        | -2.076564000 | -9.303764000 | -4.286430000 |

|   |              |              |              |
|---|--------------|--------------|--------------|
| 7 | 0.901195000  | -0.972206000 | 1.803977000  |
| 7 | -0.115903000 | -2.106023000 | -0.355922000 |
| 7 | -0.611191000 | -2.786488000 | -1.372132000 |
| 7 | -0.490967000 | -4.083033000 | -1.040912000 |
| 7 | -2.284599000 | -8.066094000 | -4.569735000 |
| 6 | 1.412262000  | -0.313236000 | 2.861473000  |
| 1 | 1.398454000  | 0.768726000  | 2.811841000  |
| 6 | 1.936847000  | -0.972153000 | 3.969464000  |
| 1 | 2.336715000  | -0.393115000 | 4.794285000  |
| 6 | 1.935124000  | -2.367677000 | 3.989391000  |
| 1 | 2.337144000  | -2.910601000 | 4.838657000  |
| 6 | 1.409170000  | -3.059873000 | 2.900452000  |
| 1 | 1.394461000  | -4.143991000 | 2.883326000  |
| 6 | 0.898956000  | -2.336987000 | 1.821540000  |
| 6 | 0.325297000  | -2.944265000 | 0.629855000  |
| 6 | 0.087649000  | -4.228758000 | 0.194483000  |
| 1 | 0.267684000  | -5.185709000 | 0.653355000  |
| 6 | -0.940609000 | -5.091977000 | -1.928361000 |
| 6 | -0.707049000 | -6.451647000 | -1.636602000 |
| 1 | -0.173980000 | -6.752230000 | -0.741562000 |
| 6 | -1.150334000 | -7.433410000 | -2.504502000 |
| 1 | -0.971035000 | -8.478404000 | -2.286440000 |
| 6 | -1.838297000 | -7.078502000 | -3.692377000 |
| 6 | -2.066838000 | -5.707963000 | -3.979381000 |
| 1 | -2.594420000 | -5.437554000 | -4.885173000 |
| 6 | -1.623469000 | -4.729811000 | -3.109345000 |
| 1 | -1.804167000 | -3.685313000 | -3.333170000 |

**Table S9.** The optimized Cartesian coordinates for all calculated states of **3b**.

| <b>S0</b> |              |              |              |
|-----------|--------------|--------------|--------------|
| 75        | 0.077645000  | -0.059920000 | -0.112402000 |
| 6         | 0.356507000  | 1.400280000  | -1.335204000 |
| 6         | -1.212876000 | -0.832375000 | -1.319160000 |
| 6         | -1.299354000 | 0.915668000  | 0.784794000  |
| 8         | 0.550841000  | 2.286111000  | -2.063192000 |
| 8         | -1.983744000 | -1.313767000 | -2.045477000 |
| 8         | -2.141497000 | 1.511473000  | 1.330825000  |
| 7         | 0.083929000  | -1.697486000 | 1.427103000  |
| 7         | 1.597382000  | 0.494881000  | 1.351364000  |
| 7         | 2.394582000  | 1.524700000  | 1.442254000  |
| 7         | 3.145866000  | 1.317662000  | 2.539886000  |
| 17        | 1.966290000  | -1.406896000 | -1.183947000 |
| 17        | 7.193192000  | 5.350614000  | 4.202036000  |
| 6         | -0.723745000 | -2.774573000 | 1.407342000  |
| 1         | -1.439068000 | -2.824212000 | 0.595391000  |
| 6         | -0.660155000 | -3.780122000 | 2.368147000  |
| 1         | -1.335863000 | -4.625872000 | 2.302995000  |
| 6         | 0.278285000  | -3.672374000 | 3.395817000  |
| 1         | 0.355361000  | -4.438393000 | 4.160901000  |
| 6         | 1.119063000  | -2.561910000 | 3.427319000  |
| 1         | 1.858731000  | -2.446079000 | 4.212075000  |
| 6         | 0.998666000  | -1.591976000 | 2.430243000  |
| 6         | 1.818905000  | -0.388528000 | 2.371751000  |
| 6         | 2.826129000  | 0.145205000  | 3.149360000  |
| 1         | 3.299677000  | -0.186204000 | 4.059874000  |
| 6         | 4.123496000  | 2.285488000  | 2.934586000  |

|           |              |              |              |
|-----------|--------------|--------------|--------------|
| 6         | 5.345017000  | 1.855412000  | 3.458306000  |
| 1         | 5.573845000  | 0.798004000  | 3.542475000  |
| 6         | 6.290176000  | 2.801522000  | 3.856172000  |
| 1         | 7.243111000  | 2.481390000  | 4.262957000  |
| 6         | 6.001019000  | 4.159204000  | 3.707651000  |
| 6         | 4.784761000  | 4.590434000  | 3.173183000  |
| 1         | 4.573396000  | 5.648922000  | 3.067693000  |
| 6         | 3.834847000  | 3.644896000  | 2.788338000  |
| 1         | 2.878543000  | 3.961579000  | 2.387325000  |
| <b>S1</b> |              |              |              |
| 75        | 0.135493000  | -0.095628000 | -0.090262000 |
| 6         | 0.345202000  | 1.410952000  | -1.333972000 |
| 6         | -1.234542000 | -0.757005000 | -1.342677000 |
| 6         | -1.238504000 | 0.830707000  | 0.972387000  |
| 8         | 0.470561000  | 2.301716000  | -2.058050000 |
| 8         | -2.037611000 | -1.125772000 | -2.084786000 |
| 8         | -2.042073000 | 1.361719000  | 1.602770000  |
| 7         | 0.112538000  | -1.713623000 | 1.370227000  |
| 7         | 1.624993000  | 0.463503000  | 1.329424000  |
| 7         | 2.431176000  | 1.517322000  | 1.414478000  |
| 7         | 3.145127000  | 1.323395000  | 2.527647000  |
| 17        | 1.851322000  | -1.372409000 | -1.269717000 |
| 17        | 7.193658000  | 5.360889000  | 4.185953000  |
| 6         | -0.688128000 | -2.815419000 | 1.353567000  |
| 1         | -1.375606000 | -2.886759000 | 0.517020000  |
| 6         | -0.653006000 | -3.800870000 | 2.313647000  |
| 1         | -1.318106000 | -4.653404000 | 2.230236000  |
| 6         | 0.267329000  | -3.677256000 | 3.403645000  |
| 1         | 0.316902000  | -4.438375000 | 4.175642000  |
| 6         | 1.088043000  | -2.571443000 | 3.452072000  |

|          |              |              |              |
|----------|--------------|--------------|--------------|
| 1        | 1.798527000  | -2.442000000 | 4.263960000  |
| 6        | 1.019692000  | -1.583736000 | 2.443684000  |
| 6        | 1.818335000  | -0.411677000 | 2.390873000  |
| 6        | 2.822002000  | 0.167564000  | 3.167319000  |
| 1        | 3.277819000  | -0.123998000 | 4.099455000  |
| 6        | 4.121153000  | 2.291511000  | 2.920968000  |
| 6        | 5.299874000  | 1.869185000  | 3.541393000  |
| 1        | 5.496057000  | 0.814251000  | 3.702254000  |
| 6        | 6.245480000  | 2.815702000  | 3.937382000  |
| 1        | 7.164811000  | 2.499201000  | 4.417809000  |
| 6        | 6.000757000  | 4.168098000  | 3.693172000  |
| 6        | 4.828373000  | 4.592819000  | 3.063934000  |
| 1        | 4.650469000  | 5.647578000  | 2.884341000  |
| 6        | 3.878830000  | 3.646881000  | 2.679215000  |
| 1        | 2.956013000  | 3.959138000  | 2.203770000  |
| <b>T</b> |              |              |              |
| 75       | 0.133603000  | -0.141831000 | -0.076664000 |
| 6        | 0.323979000  | 1.471012000  | -1.250969000 |
| 6        | -1.130148000 | -0.934705000 | -1.320644000 |
| 6        | -1.326936000 | 0.765476000  | 0.869409000  |
| 8        | 0.445420000  | 2.413606000  | -1.901357000 |
| 8        | -1.872870000 | -1.414971000 | -2.068973000 |
| 8        | -2.191985000 | 1.296923000  | 1.416418000  |
| 7        | 0.087572000  | -1.676534000 | 1.362887000  |
| 7        | 1.634210000  | 0.461590000  | 1.348853000  |
| 7        | 2.437075000  | 1.502688000  | 1.428997000  |
| 7        | 3.163588000  | 1.313634000  | 2.540117000  |
| 17       | 2.027675000  | -1.134727000 | -1.335674000 |
| 17       | 7.205954000  | 5.369314000  | 4.167387000  |
| 6        | -0.774502000 | -2.755918000 | 1.384365000  |



|   |              |              |             |
|---|--------------|--------------|-------------|
| 1 | -1.496503000 | -2.792177000 | 0.576704000 |
| 6 | -0.732533000 | -3.737933000 | 2.332628000 |
| 1 | -1.433838000 | -4.563741000 | 2.275008000 |
| 6 | 0.244136000  | -3.668191000 | 3.391990000 |
| 1 | 0.295735000  | -4.443024000 | 4.149492000 |
| 6 | 1.100247000  | -2.584285000 | 3.424212000 |
| 1 | 1.840138000  | -2.486632000 | 4.214193000 |
| 6 | 1.024972000  | -1.580910000 | 2.444500000 |
| 6 | 1.832879000  | -0.412205000 | 2.400085000 |
| 6 | 2.839876000  | 0.156952000  | 3.178205000 |
| 1 | 3.294841000  | -0.140167000 | 4.109159000 |
| 6 | 4.138961000  | 2.285852000  | 2.925527000 |
| 6 | 5.336291000  | 1.866593000  | 3.511225000 |
| 1 | 5.547678000  | 0.811260000  | 3.649406000 |
| 6 | 6.280202000  | 2.817653000  | 3.900783000 |
| 1 | 7.213862000  | 2.504054000  | 4.354857000 |
| 6 | 6.015106000  | 4.170770000  | 3.683521000 |
| 6 | 4.823915000  | 4.592202000  | 3.088404000 |
| 1 | 4.630500000  | 5.647588000  | 2.929808000 |
| 6 | 3.875579000  | 3.641820000  | 2.711553000 |
| 1 | 2.938280000  | 3.951726000  | 2.263366000 |

**Table S9.** The optimized Cartesian coordinates for all calculated states of **3c**.

| <b>S0</b> |              |              |              |
|-----------|--------------|--------------|--------------|
| 75        | -0.191870000 | 0.038035000  | 0.086016000  |
| 17        | 2.084751000  | -0.081803000 | -1.070185000 |
| 6         | -1.045331000 | 0.633027000  | -1.533308000 |
| 6         | 0.124521000  | 1.869601000  | 0.599609000  |
| 6         | -1.866992000 | 0.036433000  | 1.004584000  |
| 8         | -1.554610000 | 0.967533000  | -2.524127000 |
| 8         | 0.331740000  | 2.971080000  | 0.912660000  |
| 8         | -2.889952000 | 0.037386000  | 1.567133000  |
| 7         | 0.874537000  | -0.957816000 | 1.795267000  |
| 7         | -0.268453000 | -2.102263000 | -0.321230000 |
| 7         | -0.790665000 | -2.792826000 | -1.301985000 |
| 7         | -0.490146000 | -4.080582000 | -1.053372000 |
| 7         | -2.114010000 | -8.154070000 | -4.574805000 |
| 6         | 1.421154000  | -0.312512000 | 2.843171000  |
| 1         | 1.308172000  | 0.764825000  | 2.857032000  |
| 6         | 2.097351000  | -0.973737000 | 3.864604000  |
| 1         | 2.517984000  | -0.402712000 | 4.685001000  |
| 6         | 2.216840000  | -2.363435000 | 3.804721000  |
| 1         | 2.737622000  | -2.910579000 | 4.584180000  |
| 6         | 1.654251000  | -3.042388000 | 2.726290000  |
| 1         | 1.725335000  | -4.121942000 | 2.648649000  |
| 6         | 0.990572000  | -2.313577000 | 1.736831000  |
| 6         | 0.360431000  | -2.921800000 | 0.572335000  |
| 6         | 0.222907000  | -4.210959000 | 0.095906000  |
| 1         | 0.583106000  | -5.163951000 | 0.449740000  |
| 6         | -0.919287000 | -5.110613000 | -1.949026000 |

|           |              |              |              |
|-----------|--------------|--------------|--------------|
| 6         | -1.387721000 | -6.325186000 | -1.437699000 |
| 1         | -1.452527000 | -6.484559000 | -0.365438000 |
| 6         | -1.796297000 | -7.329325000 | -2.309279000 |
| 1         | -2.161143000 | -8.270636000 | -1.907256000 |
| 6         | -1.758113000 | -7.133190000 | -3.705846000 |
| 6         | -1.292141000 | -5.895352000 | -4.198884000 |
| 1         | -1.249103000 | -5.725429000 | -5.271394000 |
| 6         | -0.871804000 | -4.894314000 | -3.330362000 |
| 1         | -0.502693000 | -3.951879000 | -3.721256000 |
| 1         | -2.716934000 | -8.877101000 | -4.199981000 |
| 1         | -2.380967000 | -7.878149000 | -5.512478000 |
| <b>S1</b> |              |              |              |
| 75        | -0.006657000 | -0.013895000 | -0.012758000 |
| 17        | 2.377287000  | -0.249089000 | -1.049568000 |
| 6         | -0.696741000 | 0.554133000  | -1.726254000 |
| 6         | 0.396636000  | 1.827638000  | 0.446259000  |
| 6         | -1.733047000 | 0.122520000  | 0.784378000  |
| 8         | -1.113716000 | 0.873505000  | -2.768020000 |
| 8         | 0.648614000  | 2.929640000  | 0.725036000  |
| 8         | -2.789626000 | 0.202518000  | 1.276122000  |
| 7         | 0.876549000  | -0.941270000 | 1.768796000  |
| 7         | -0.184454000 | -2.115581000 | -0.358331000 |
| 7         | -0.680412000 | -2.807921000 | -1.357411000 |
| 7         | -0.506697000 | -4.103938000 | -1.030532000 |
| 7         | -2.243285000 | -8.023863000 | -4.549940000 |
| 6         | 1.395242000  | -0.301017000 | 2.851093000  |
| 1         | 1.375040000  | 0.783285000  | 2.809418000  |
| 6         | 1.925317000  | -0.944967000 | 3.949380000  |
| 1         | 2.325058000  | -0.359018000 | 4.770171000  |
| 6         | 1.938597000  | -2.375739000 | 3.980860000  |

|          |              |              |              |
|----------|--------------|--------------|--------------|
| 1        | 2.346517000  | -2.911253000 | 4.831872000  |
| 6        | 1.416154000  | -3.056218000 | 2.899695000  |
| 1        | 1.402876000  | -4.142872000 | 2.882064000  |
| 6        | 0.889131000  | -2.350151000 | 1.797934000  |
| 6        | 0.322712000  | -2.955857000 | 0.641218000  |
| 6        | 0.106701000  | -4.246783000 | 0.188539000  |
| 1        | 0.332434000  | -5.203392000 | 0.627509000  |
| 6        | -0.940562000 | -5.103465000 | -1.918651000 |
| 6        | -0.728261000 | -6.468383000 | -1.615022000 |
| 1        | -0.226683000 | -6.765827000 | -0.703132000 |
| 6        | -1.158124000 | -7.440328000 | -2.487705000 |
| 1        | -0.996374000 | -8.488539000 | -2.260482000 |
| 6        | -1.819344000 | -7.077699000 | -3.701339000 |
| 6        | -2.022753000 | -5.693330000 | -3.996371000 |
| 1        | -2.521565000 | -5.409984000 | -4.917172000 |
| 6        | -1.590758000 | -4.728355000 | -3.120084000 |
| 1        | -1.744294000 | -3.680303000 | -3.339706000 |
| 1        | -2.107916000 | -9.009232000 | -4.355241000 |
| 1        | -2.713078000 | -7.789736000 | -5.416809000 |
| <b>T</b> |              |              |              |
| 75       | -0.013049000 | 0.038642000  | -0.008242000 |
| 17       | 2.367832000  | -0.220087000 | -0.973998000 |
| 6        | -0.689960000 | 0.639538000  | -1.704597000 |
| 6        | 0.385774000  | 1.863023000  | 0.489664000  |
| 6        | -1.749746000 | 0.170552000  | 0.765449000  |
| 8        | -1.094979000 | 0.978240000  | -2.742676000 |
| 8        | 0.640761000  | 2.958315000  | 0.797046000  |
| 8        | -2.814524000 | 0.251712000  | 1.241076000  |
| 7        | 0.855924000  | -0.967286000 | 1.800021000  |
| 7        | -0.188798000 | -2.076298000 | -0.372108000 |

|   |              |              |              |
|---|--------------|--------------|--------------|
| 7 | -0.708783000 | -2.751267000 | -1.408760000 |
| 7 | -0.511820000 | -4.122489000 | -1.066083000 |
| 7 | -2.239914000 | -8.070797000 | -4.532988000 |
| 6 | 1.361415000  | -0.328723000 | 2.872898000  |
| 1 | 1.313390000  | 0.753508000  | 2.854695000  |
| 6 | 1.918056000  | -1.001978000 | 3.956271000  |
| 1 | 2.310056000  | -0.436305000 | 4.794489000  |
| 6 | 1.958114000  | -2.398134000 | 3.933608000  |
| 1 | 2.386427000  | -2.955116000 | 4.761062000  |
| 6 | 1.437289000  | -3.068760000 | 2.830020000  |
| 1 | 1.451640000  | -4.152149000 | 2.779292000  |
| 6 | 0.890740000  | -2.329172000 | 1.776719000  |
| 6 | 0.309792000  | -2.927593000 | 0.582758000  |
| 6 | 0.124100000  | -4.221259000 | 0.179448000  |
| 1 | 0.371069000  | -5.160982000 | 0.642641000  |
| 6 | -0.926274000 | -5.094479000 | -1.905629000 |
| 6 | -0.734965000 | -6.487652000 | -1.588390000 |
| 1 | -0.247623000 | -6.778022000 | -0.665846000 |
| 6 | -1.167255000 | -7.453920000 | -2.454076000 |
| 1 | -1.019918000 | -8.502236000 | -2.210880000 |
| 6 | -1.815140000 | -7.104901000 | -3.686077000 |
| 6 | -2.001345000 | -5.722392000 | -4.000729000 |
| 1 | -2.490408000 | -5.453715000 | -4.932911000 |
| 6 | -1.574991000 | -4.740086000 | -3.147216000 |
| 1 | -1.716075000 | -3.694945000 | -3.386228000 |
| 1 | -2.123171000 | -9.053739000 | -4.319524000 |
| 1 | -2.703128000 | -7.843815000 | -5.404383000 |
